# Supplementary material
Source: publisher figshare collection journal article supplement (https://geolsoc.figshare.com/ndownloader/files/28114945)
Supplement: Supplementary file 1 [file 28114945]

Supplementary Figures

**Molecular and petrographical evidence for lacustrine environmental and biotic change in the palaeo-Sichuan mega-lake (China) during the Toarcian Oceanic Anoxic Event**

Weimu Xu <sup>a,b,\*</sup>, Johan W.H. Weijers <sup>c</sup>, Micha Ruhl <sup>a,d</sup>, Erdem F. Idiz <sup>a</sup>, Hugh C. Jenkyns <sup>a</sup>, James B. Riding <sup>e</sup>, Olga Gorbanenko <sup>a</sup>, Stephen P. Hesselbo <sup>f</sup>

<sup>a</sup> Department of Earth Sciences, University of Oxford, Oxford OX1 3AN, UK

<sup>b</sup> School of Earth Sciences, University College Dublin, Belfield, Dublin 4, Ireland

<sup>c</sup> Shell Global Solutions International B.V., Shell Technology Centre Amsterdam, Grasweg 31, 1031 HW, Amsterdam, The Netherlands

<sup>d</sup> Department of Geology, Trinity College Dublin, The University of Dublin, College Green, Dublin 2, Ireland

<sup>e</sup> British Geological Survey, Keyworth, Nottingham NG12 5GG, UK

<sup>f</sup> Camborne School of Mines and Environment and Sustainability Institute, University of Exeter, Penryn Campus, Penryn, Cornwall TR10 9FE, UK

\* Corresponding author: weimu.xu1@ucd.ie

A-1

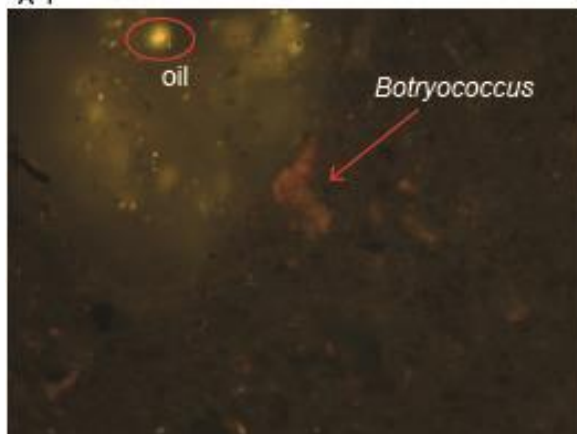

A-2

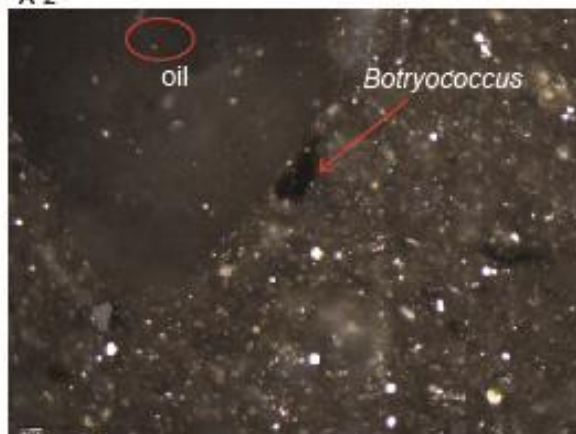

B-1

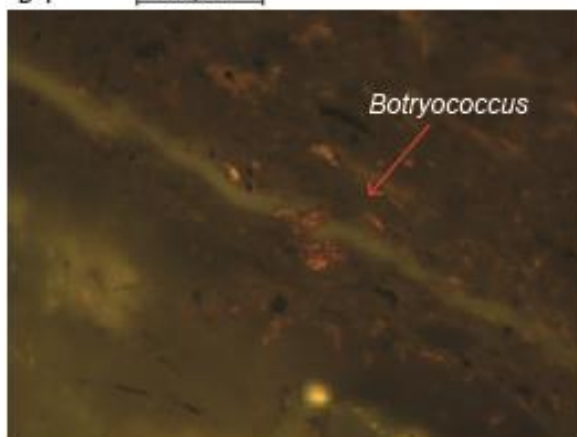

B-2

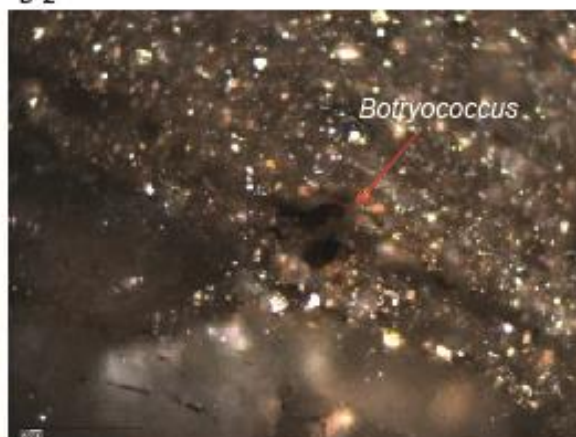

C-1

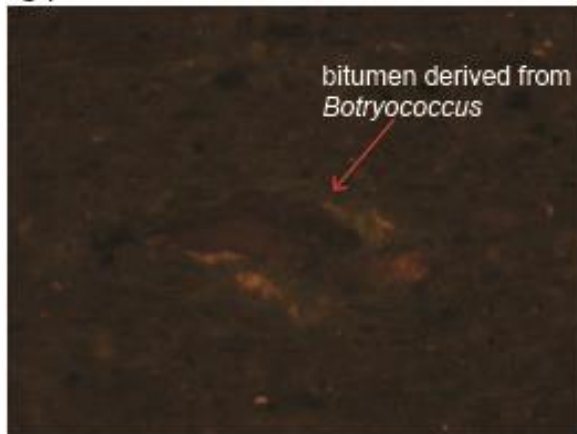

C-2

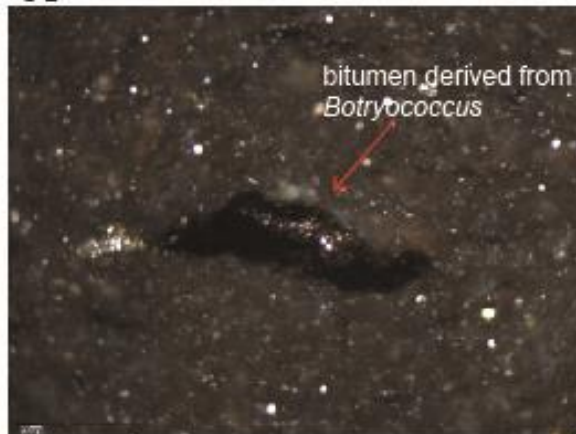

D

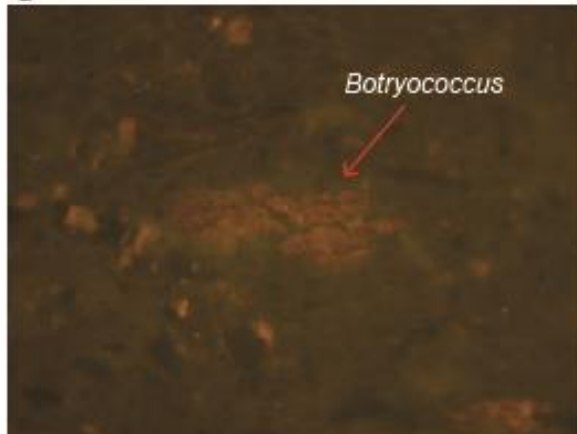

E

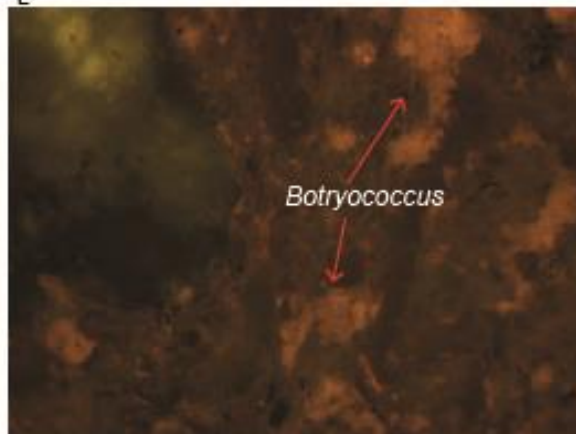

F-1

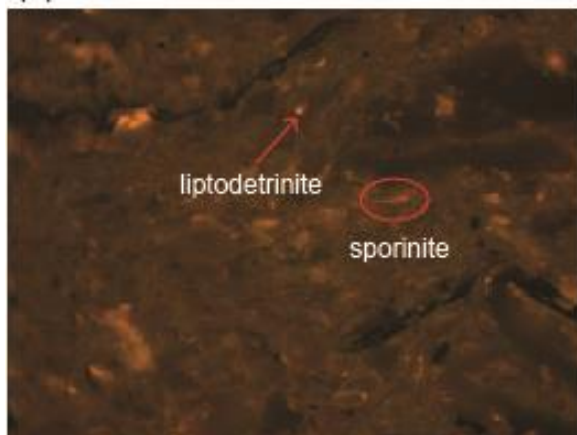

F-2

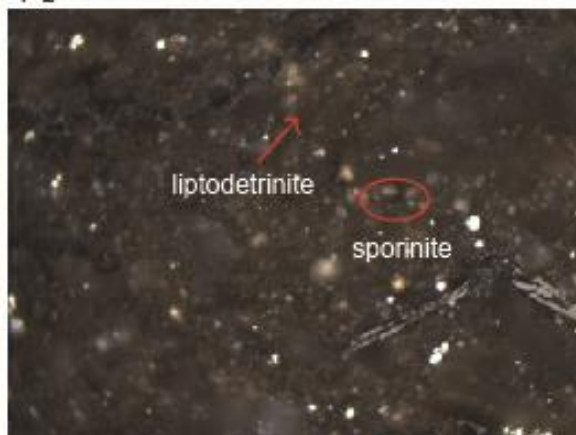

G

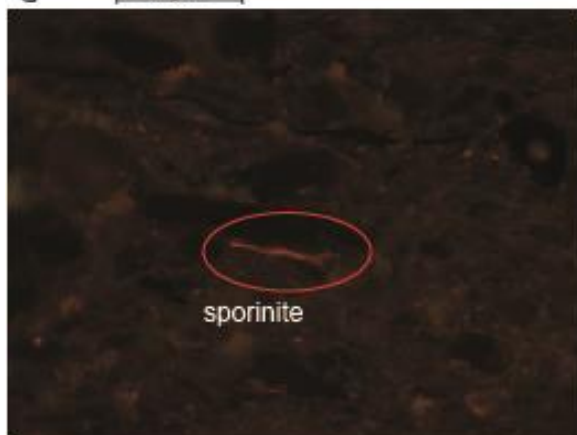

H

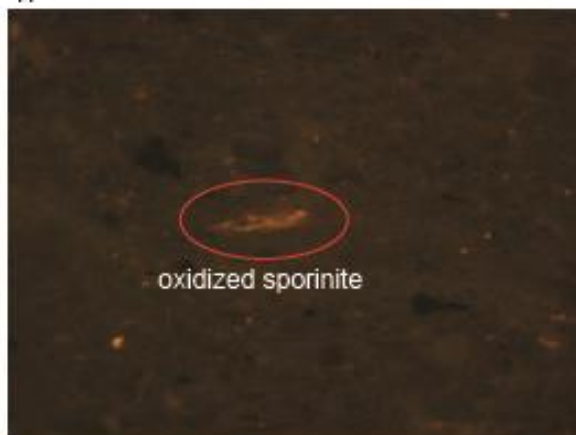

I

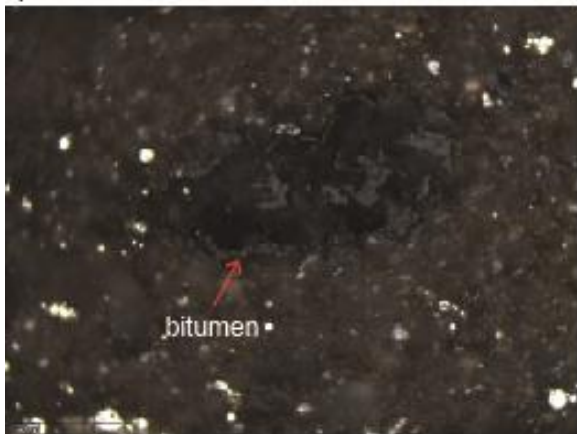

J

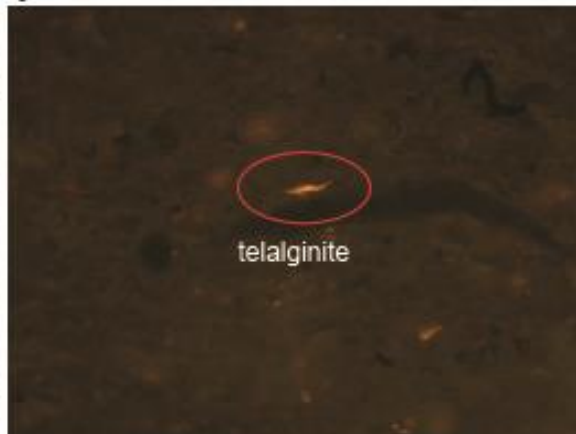

K-1

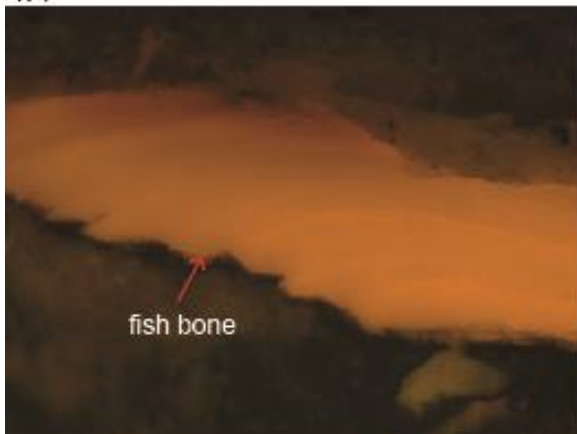

K-2

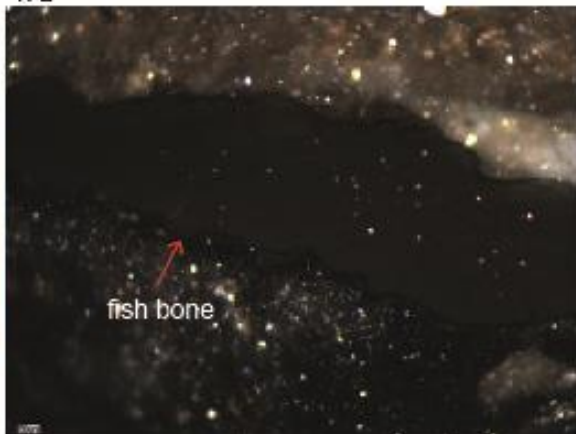



L-1

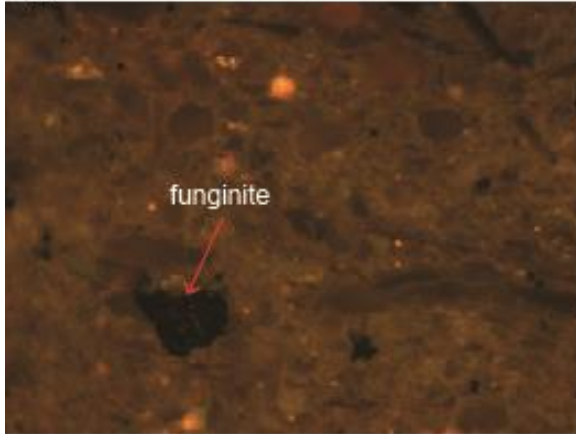

M-1

50  $\mu$ m

L-2

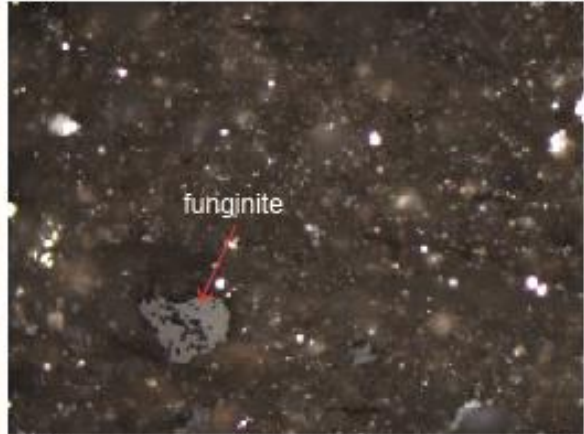

M-2

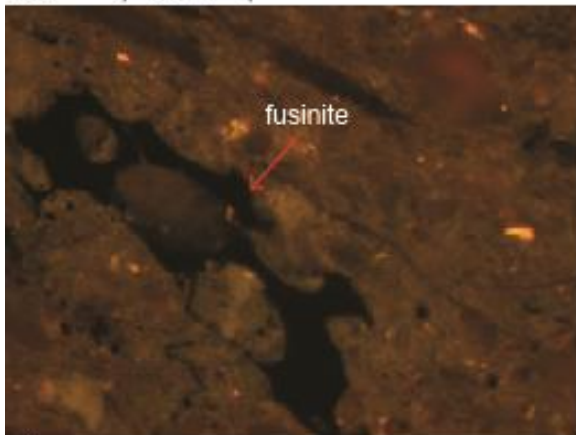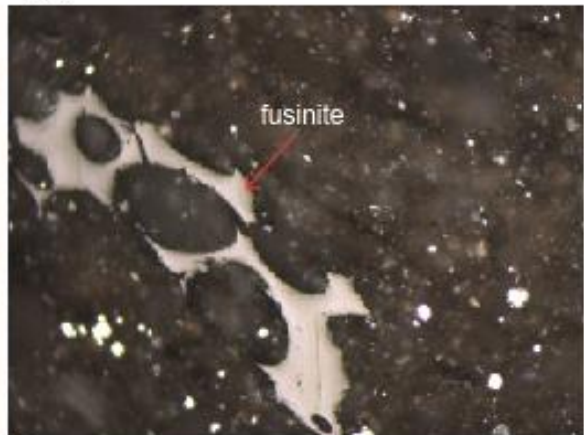

N

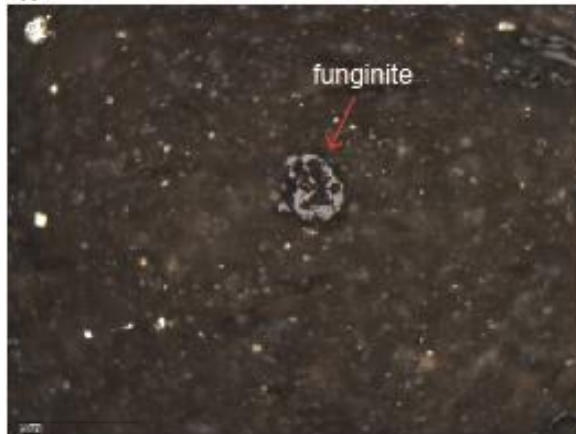

O

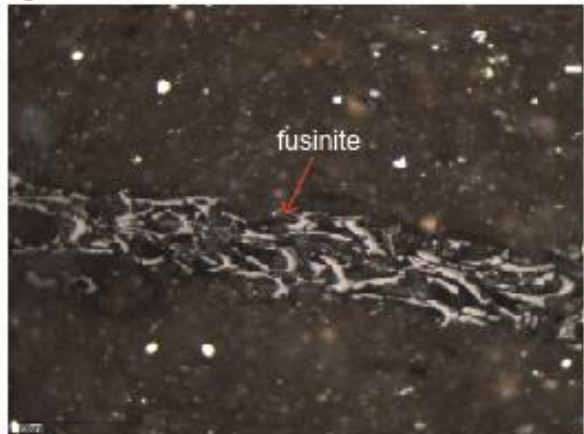

P

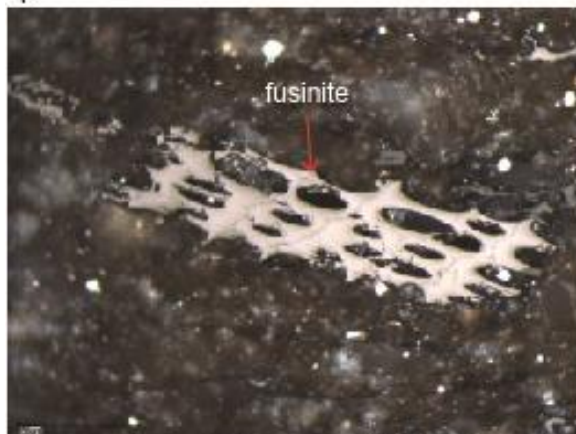

Q

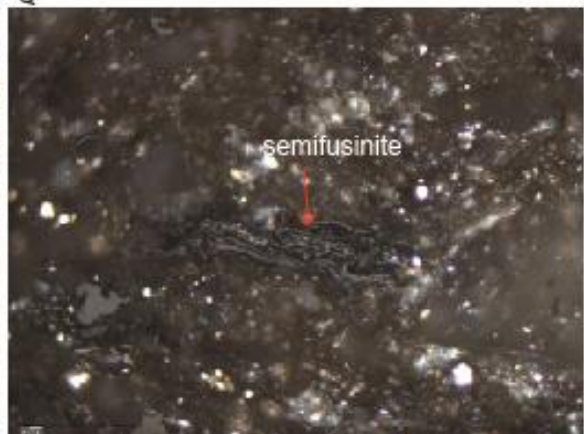

**S\_Fig. 1**      Photos of different macerals from Core A (extended photos for Fig. 5 in the main text). Plate 1: Examples of telalginite (specifically *Botryococcus-derived*), showing an orange-yellow colour of moderate intensity in the UV light and dark grey-brownish colour in the reflected white light (in oil immersion). Photos A-1 and A-2: *Botryococcus*-derived telalginite close to oil droplets under UV and reflected white light (Core A: 2681.17 m ); photos B-1 and B-2: *Botryococcus*-derived telalginite under UV and reflected white light (Core A: 2681.17 m ); photos C-1 and C-2: bitumen originated from *Botryococcus* under UV and reflected white light (Core A: 2691.25 m); photo D: *Botryococcus*-derived telalginite under UV light (Core A: 2681.17 m ); photo E: *Botryococcus*-derived telalginite close to oil droplets under UV light (Core A: 2702.13 m).

Plate 2: Examples of liptinite (sporinite, liptodetrinite, telalginite) and zooclast (fish bone) (oil immersion). Photos F-1 and F-2: sporinite and liptodetrinite in orange colour under UV light and dark grey under reflected white light (Core A: 2702.13 m); photo G: sporinite showing an orange colour under UV light (Core A: 2710.73 m); photo H: oxidized sporinite that is poorly preserved in orange-yellow colour under the UV light (Core A: 2691.25 m); photo I: bitumen showing a dark grey colour and low reflectance in reflected white light (Core A: 2702.13 m); photo J: telalginite in bright orange colour under UV light (Core A: 2691.25 m); photos K-1 and K-2: a relict of fish bone showing bright orange fluorescence under UV light and dark grey colour in reflected white light (Core A: 2681.17 m ).

Plate 3: Examples of inertinite particles (fusinite, semifusinite and funginite) (under oil immersion). Photos L-1 and L-2: funginite particle showing a light grey colour under reflected white light and dark grey under UV light (Core A: 2710.73 m); photos M-1 and M-2: fusinite particle showing high-reflecting light grey colour under reflected white light and dark grey under UV light (Core A: 2710.73 m); photo N: funginite particle showing a light grey colour under reflected white light (Core A: 2691.25 m); photo O: fusinite particle

(a) MS/MS spectrum of the 30H precursor ion (m/z 304.1) showing the precursor ion peak at m/z 304.1 and various fragment ions. The x-axis is Retention time and the y-axis is Signal intensity. The spectrum shows the precursor ion peak at m/z 304.1 and various fragment ions. The x-axis is Retention time and the y-axis is Signal intensity.

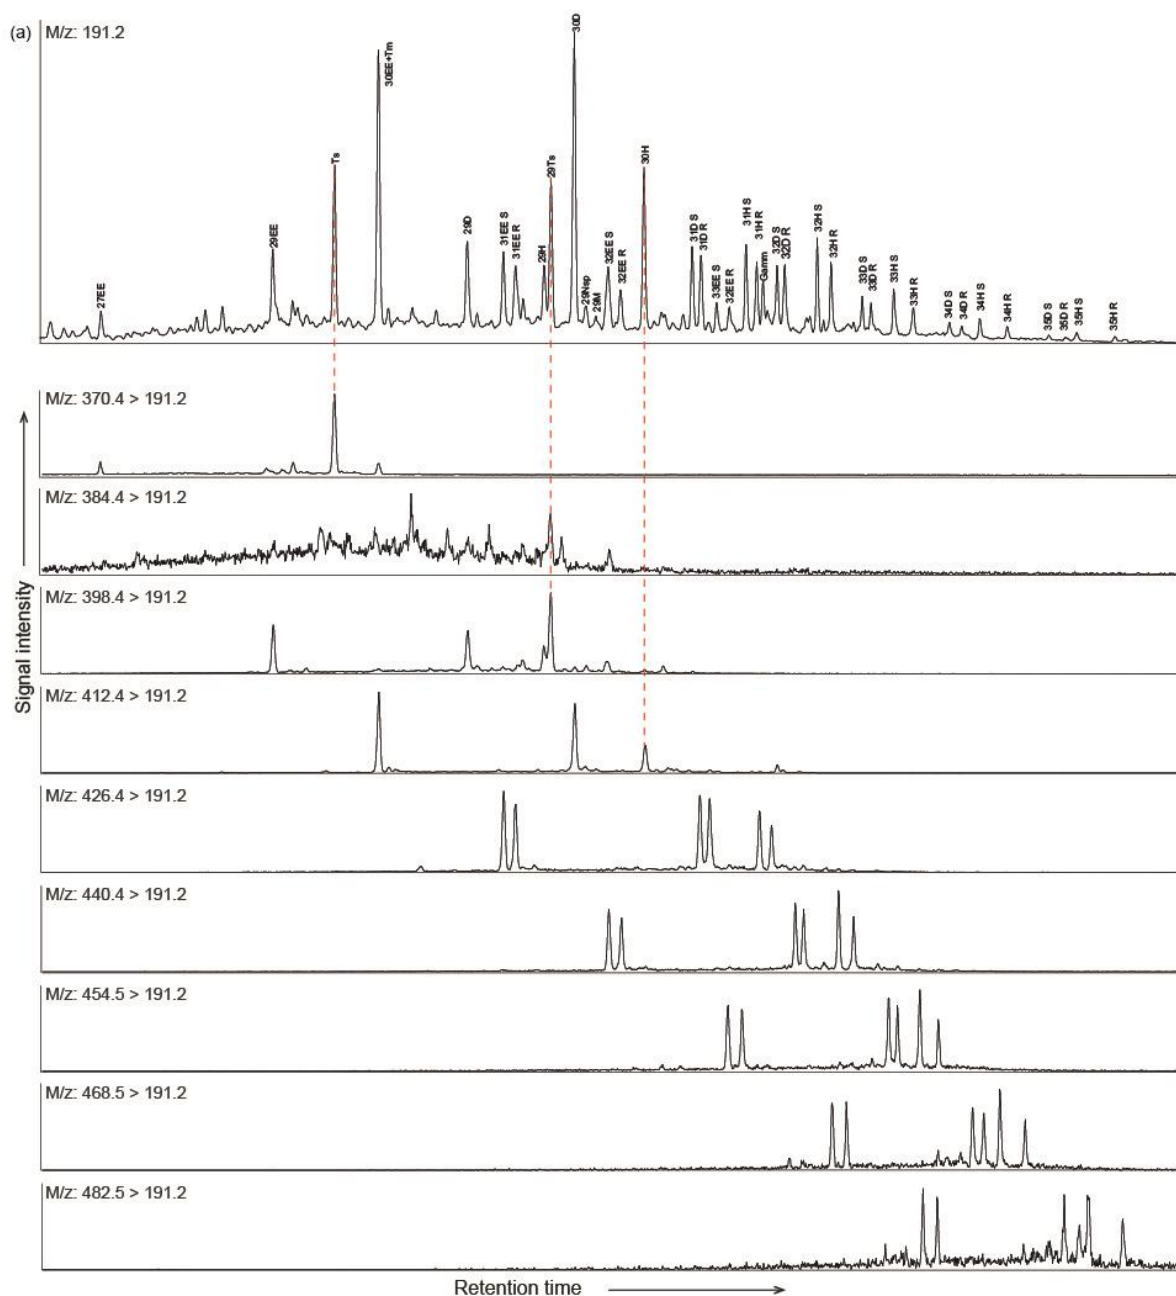

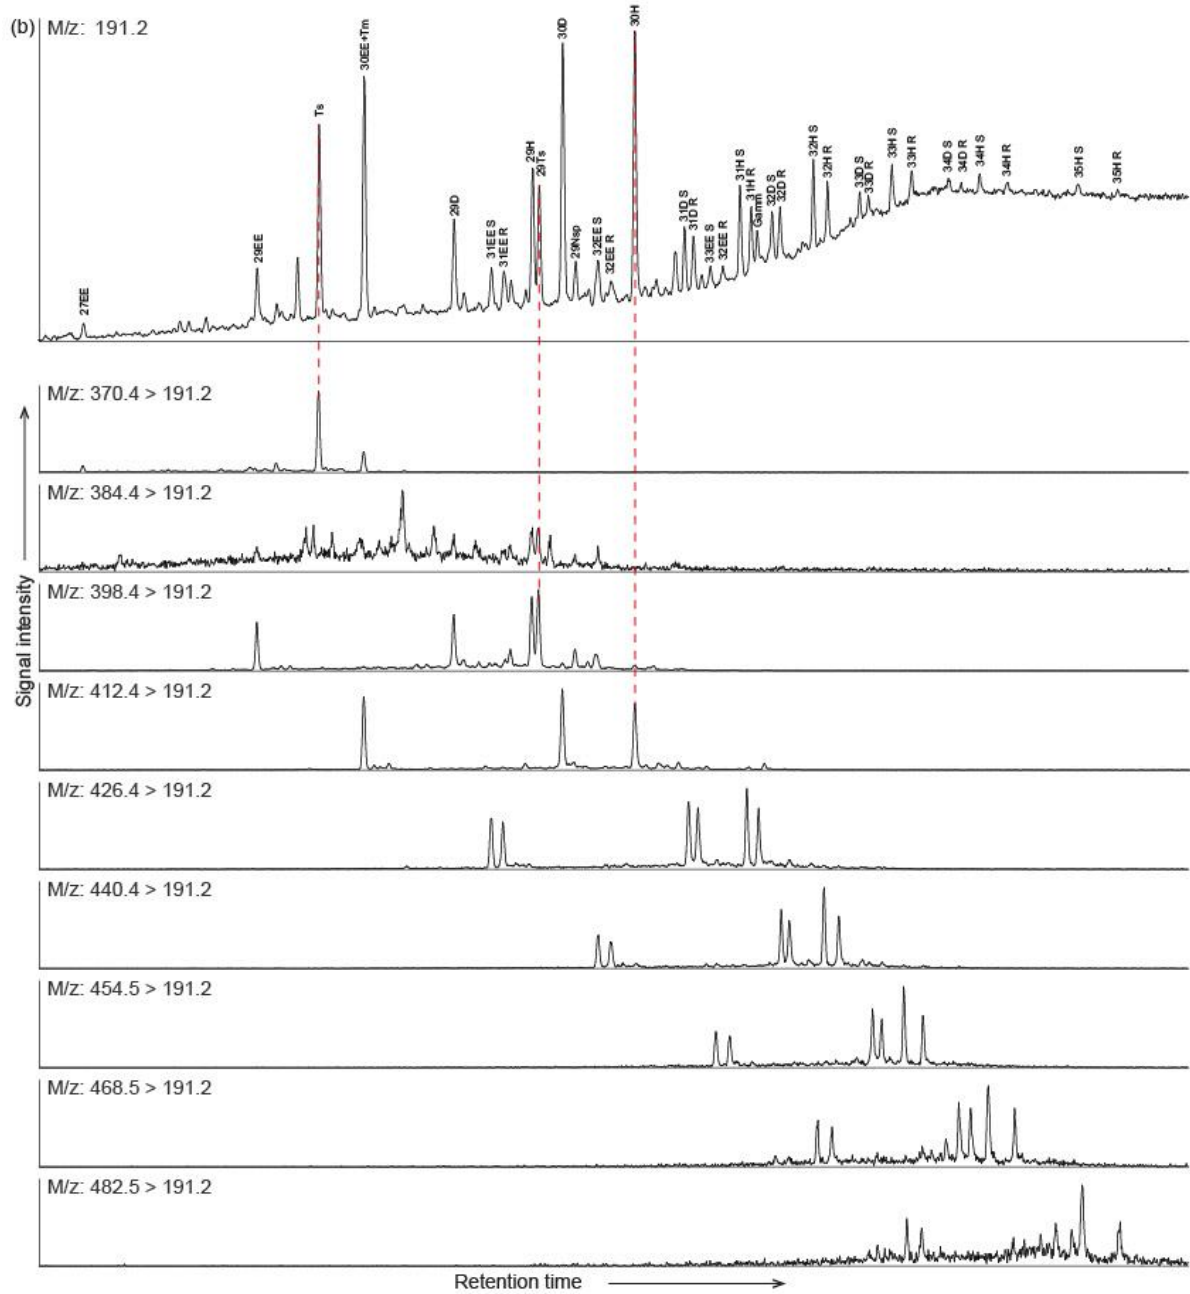

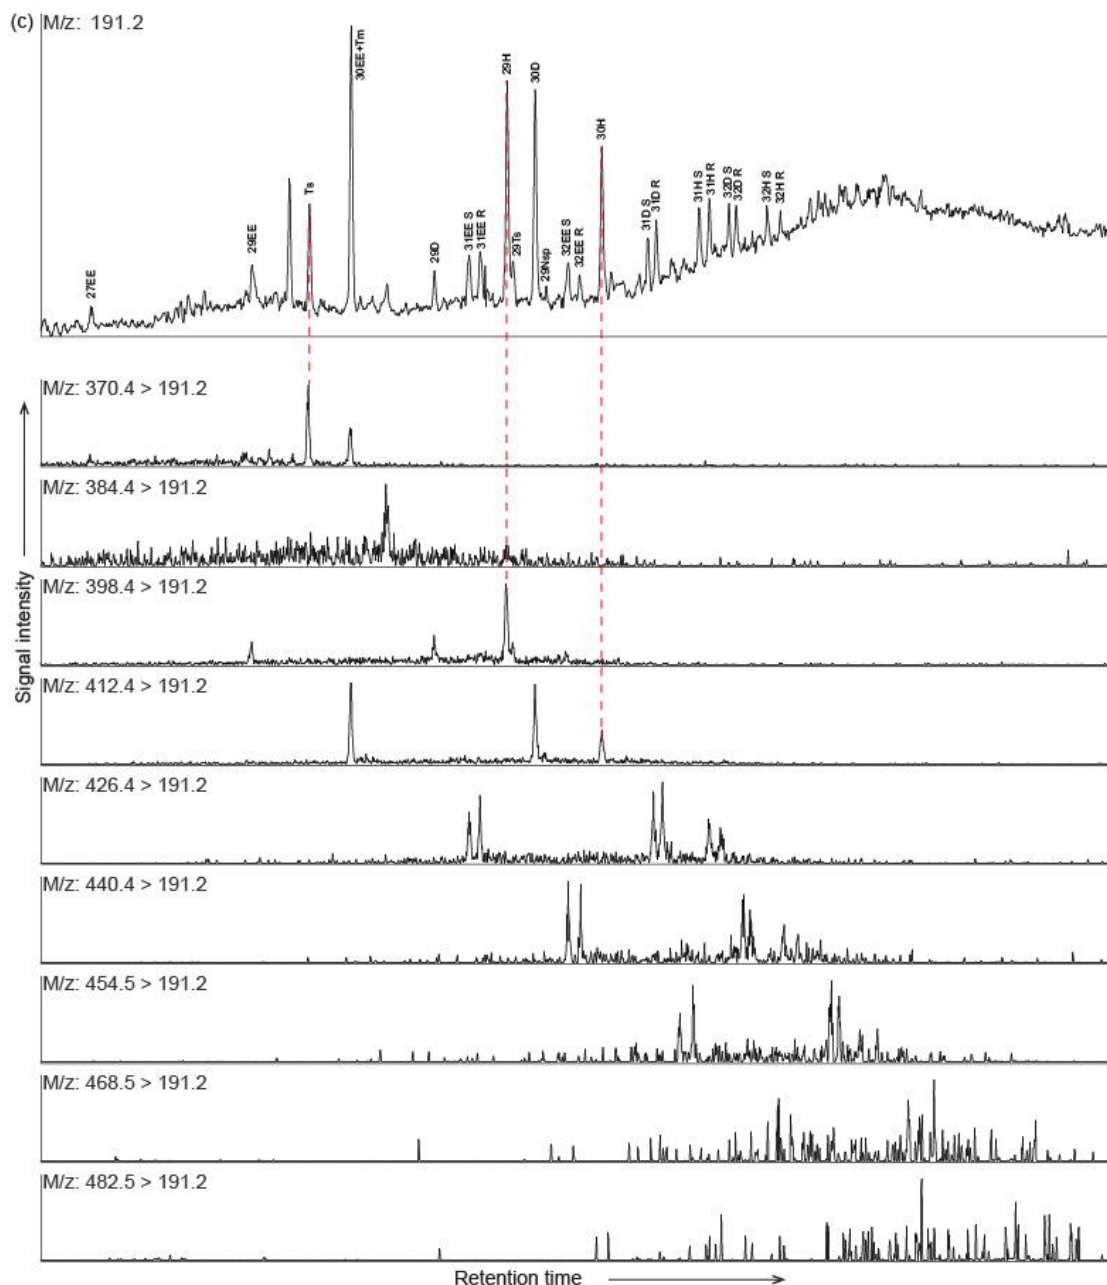

**S\_Fig. 2** Chromatogram of  $m/z$  191 from GC/MS aligned with panels of mass chromatograms of  $C_{27}$ – $C_{35}$  hopanes from GC/MSxMS data (extended chromatograms for Fig. 7 in the main text). (a) depth 2681.17 m (Core A); (b) depth 2702.13 m (Core A); (c) depth 3120.5 m (Core B). In the GC/MSxMS panels, the different transitions all have the same range for the  $x$ -axis and are all auto-scaled for the  $y$ -axis. Abbreviations: EE: early eluting hopane, D: diahopane, H: hopane, Gamm: Gammacerane.



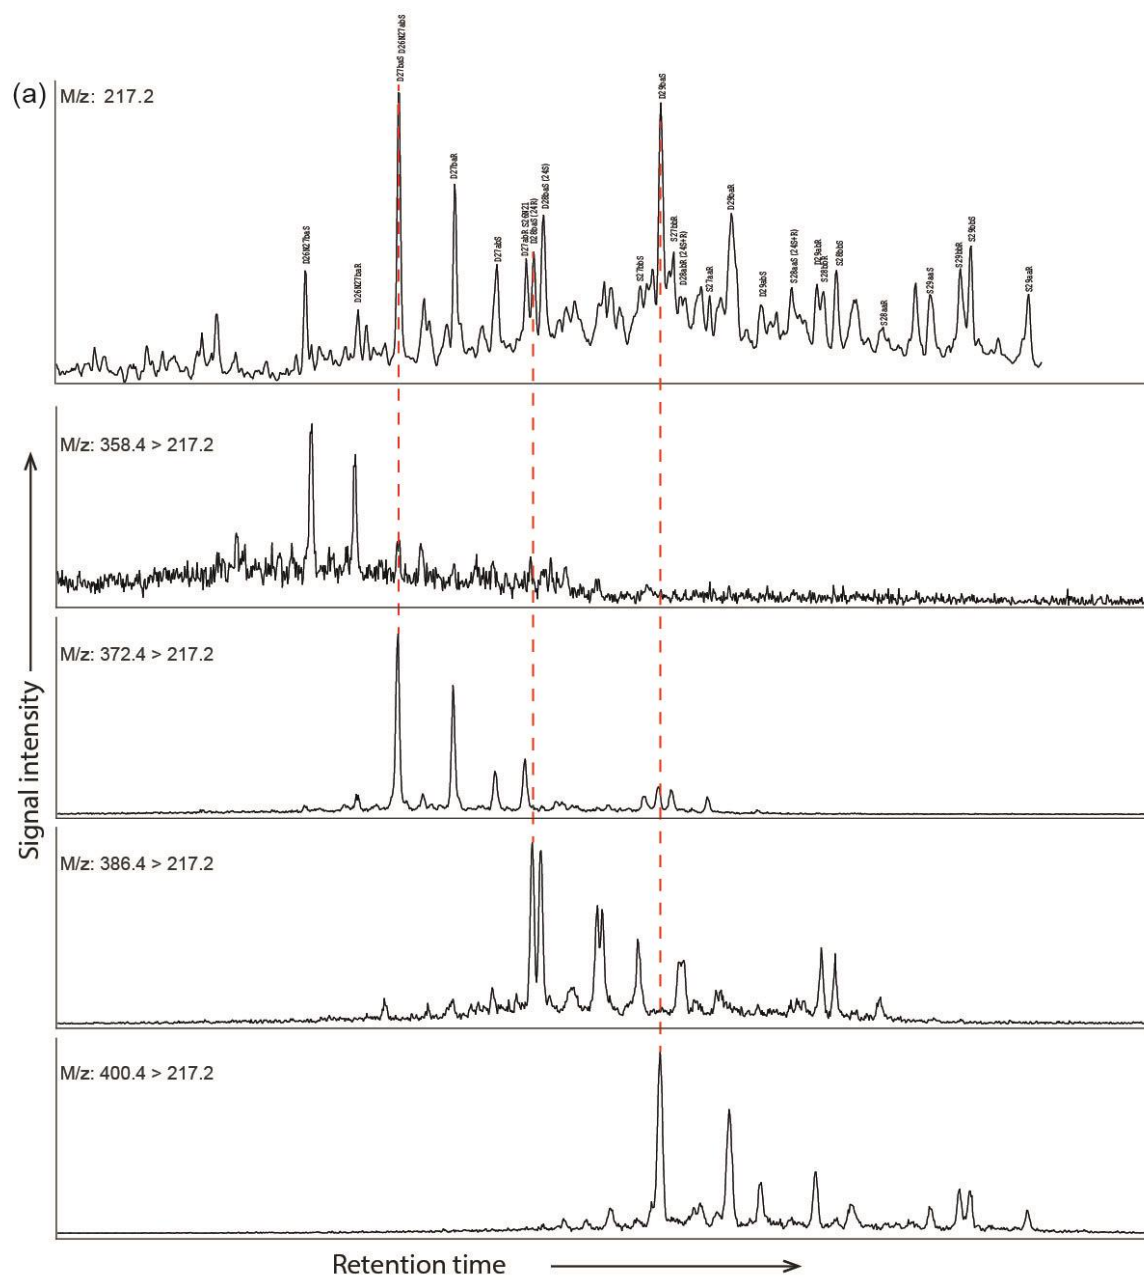

M/z: 217.2

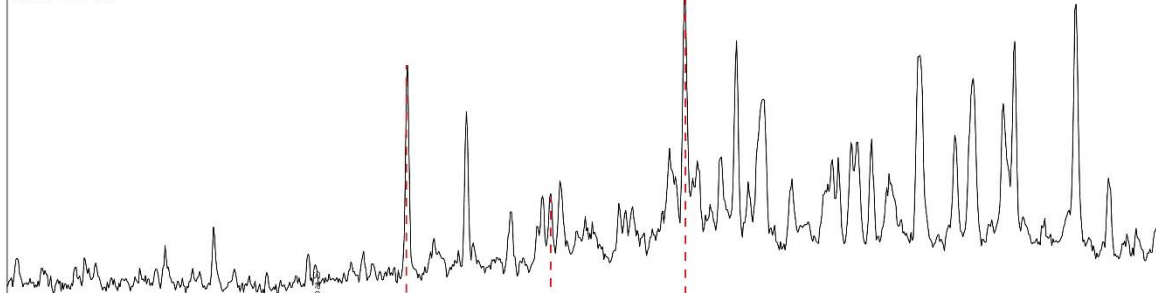

M/z: 358.4 > 217.2

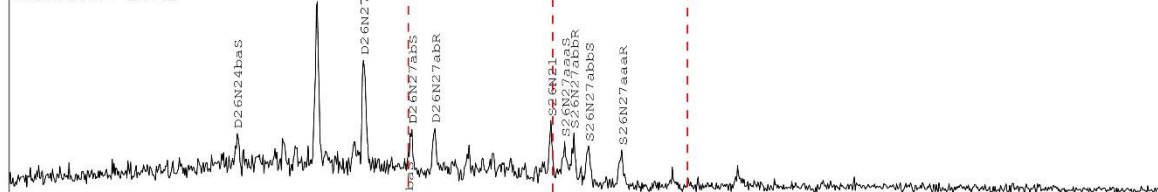

M/z: 372.4 > 217.2

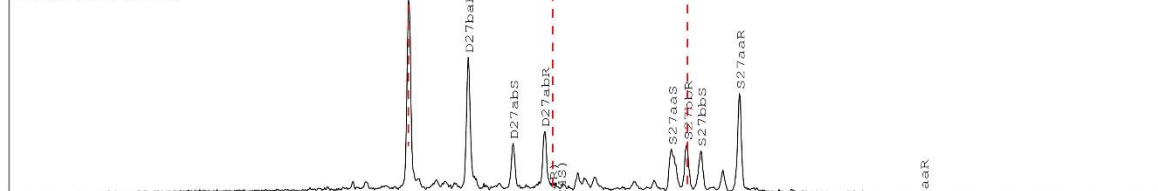

M/z: 386.4 > 217.2

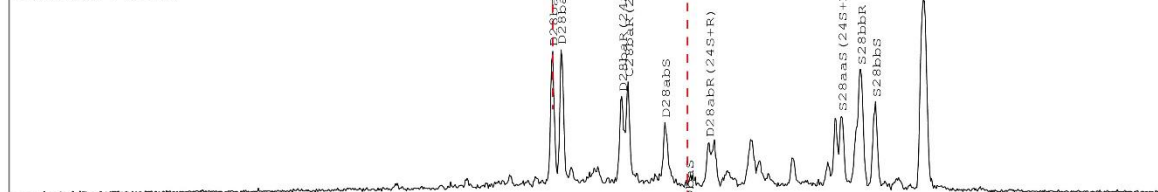

M/z: 400.4 > 217.2

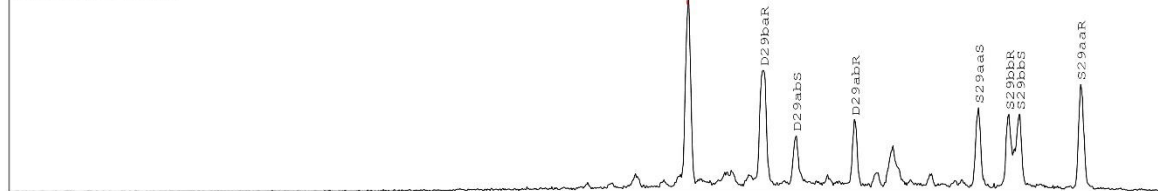

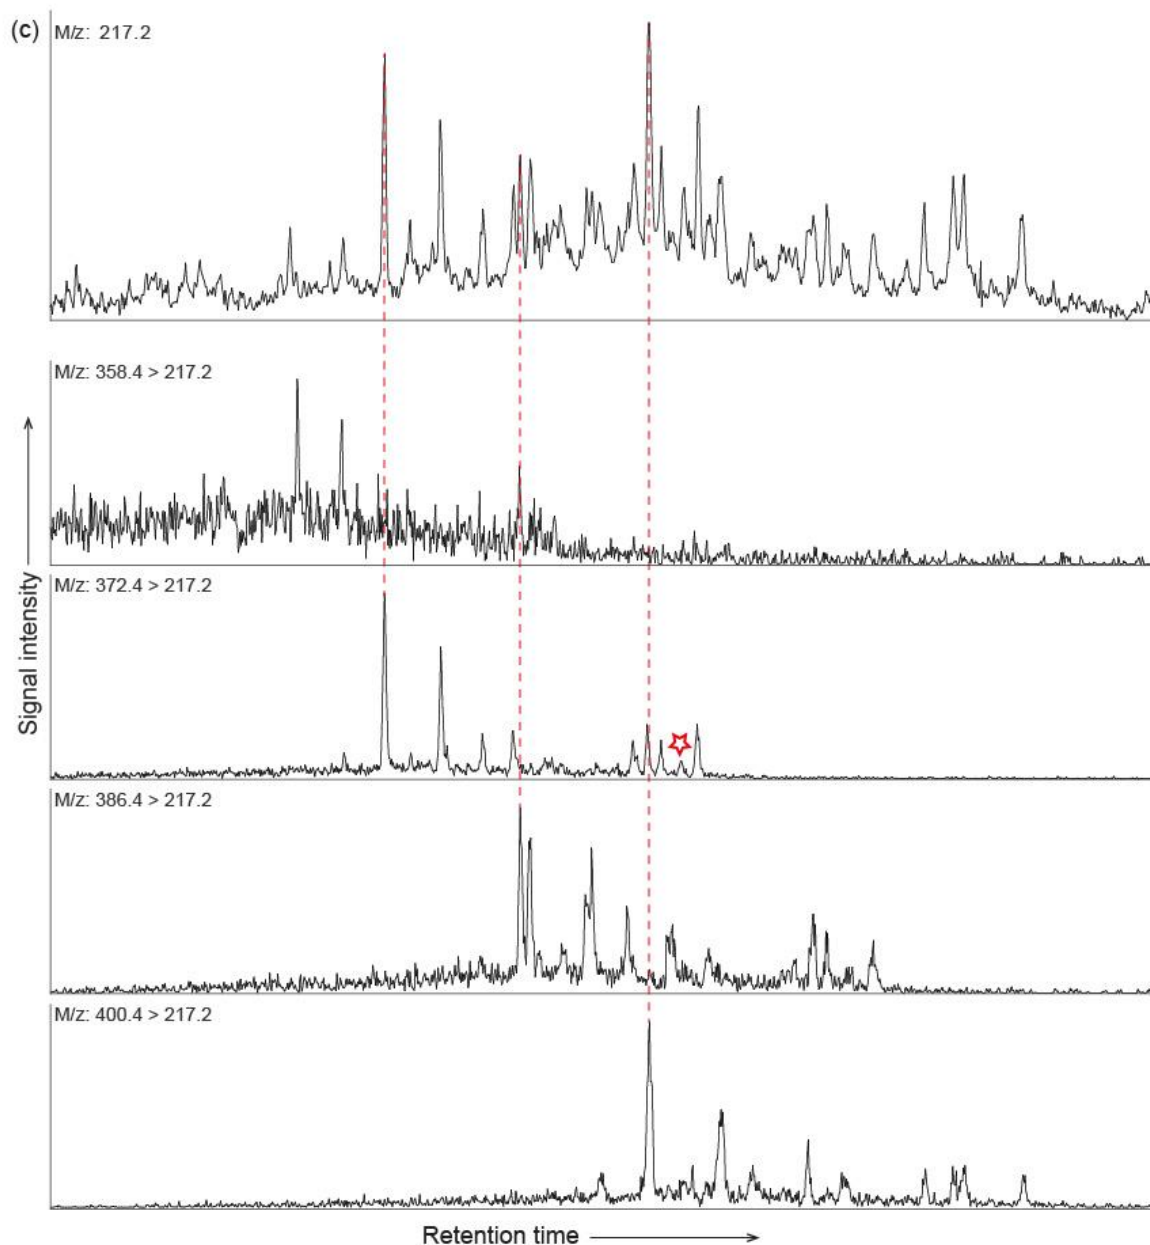

**S\_Fig. 3** Mass chromatogram of  $m/z$  217 from GC/MS aligned with panels of chromatograms of  $C_{26}$ – $C_{29}$  steranes from GC/MSxMS data (extended chromatograms for Fig. 8 in the main text). (a) depth 2681.17 m (Core A); (b) depth 2702.13 m (Core A); (c) depth 3120.5 m (Core B). In the GC/MSxMS panels, the different transitions all have the same range for the  $x$ -axis and are all auto-scaled for the  $y$ -axis. The red stars marked in the mass transition  $m/z$  372 $\rightarrow$ 217 in (b) and (c) indicate the unknown peak.

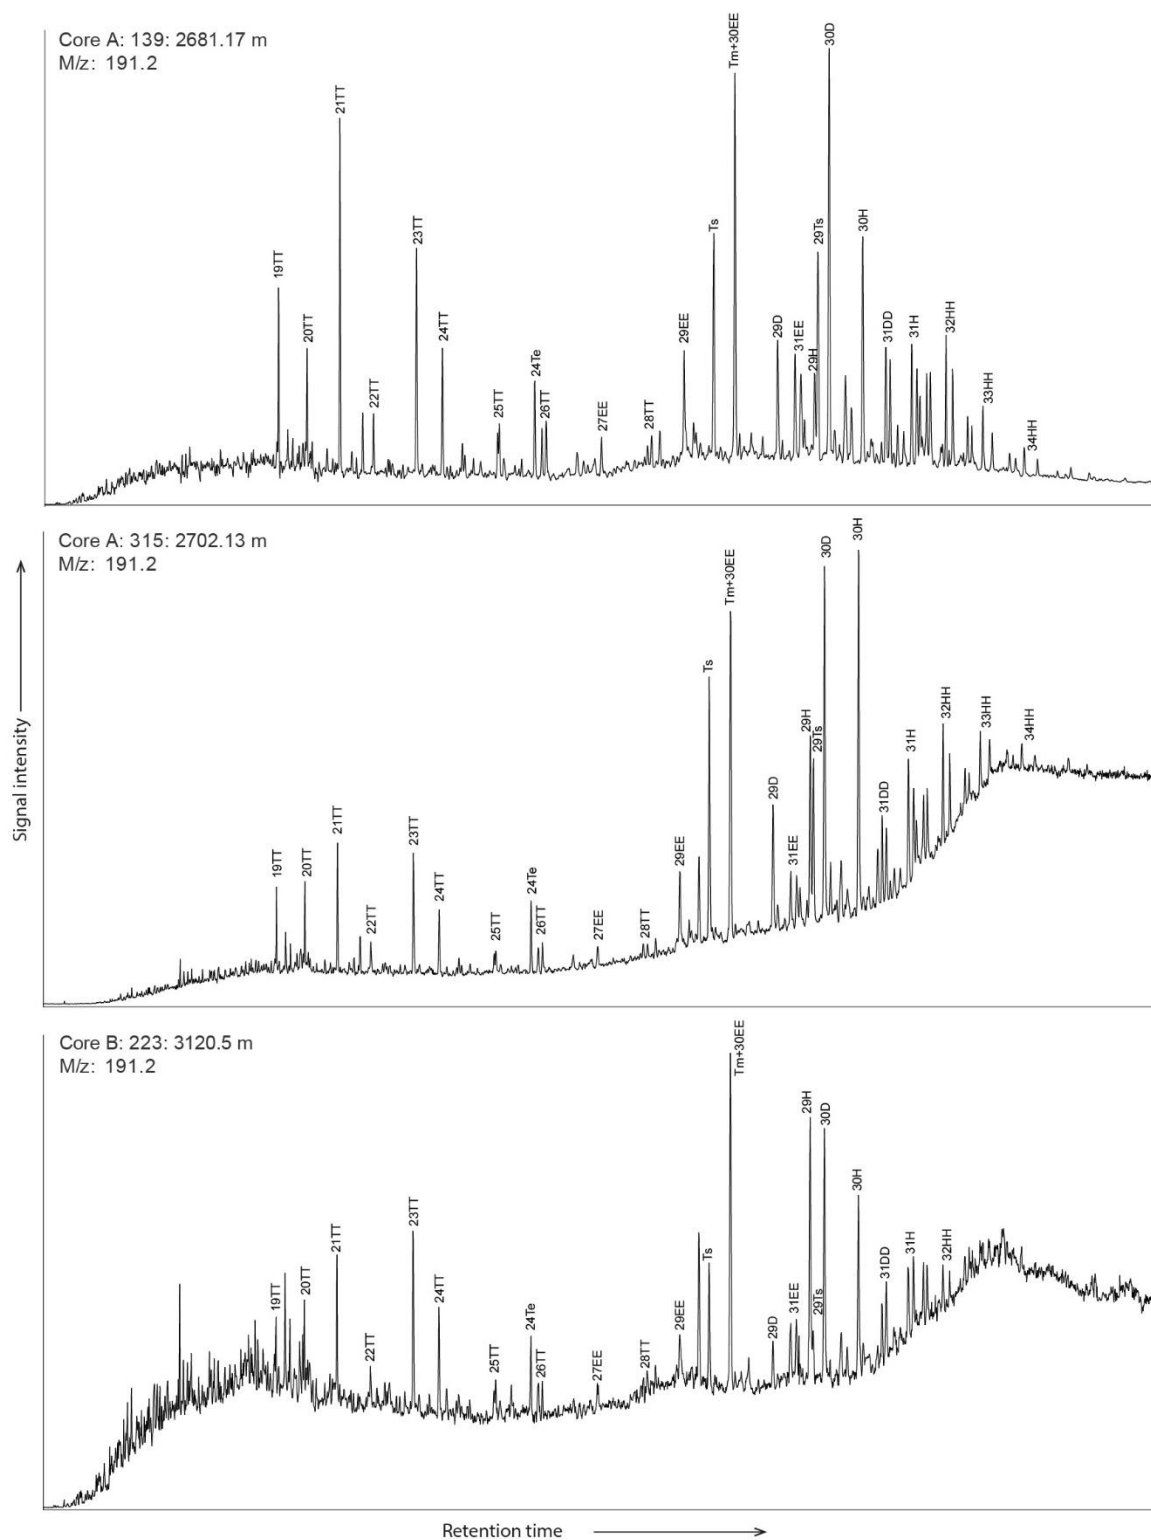

**S\_Fig. 4** GC/MS mass chromatogram of  $m/z$  191 illustrating the tricyclic and pentacyclic terpanes. 19TT to 26TT represent tricyclic terpanes of  $C_{19}$ – $C_{26}$ ; 24Te represents  $C_{24}$  tetracyclic terpane. Abbreviations are as in supplementary Fig. 2



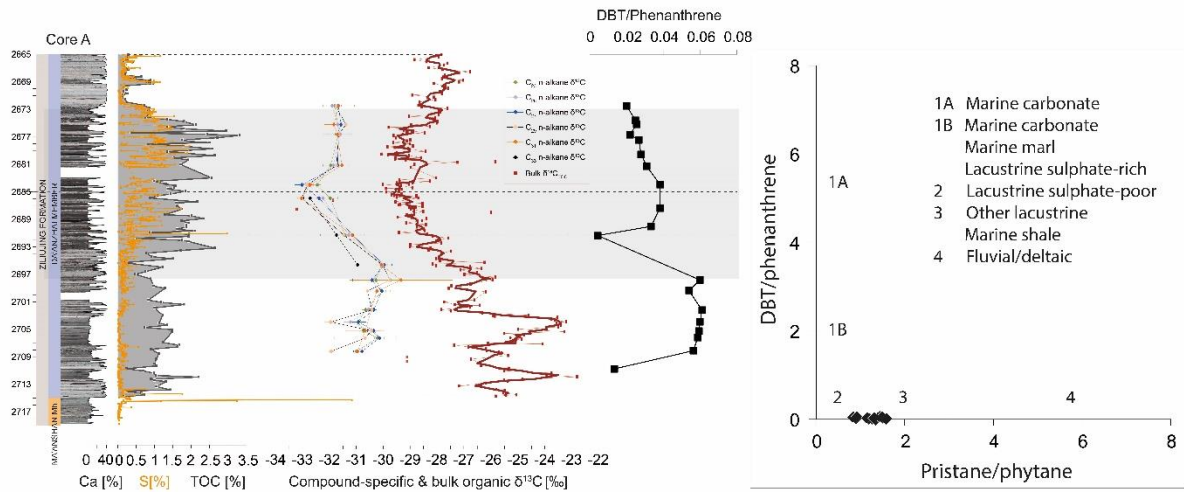

**S\_Fig. 5** DBT/Phenanthrene ratios over the studied interval, plotted against TOC, S content,  $\delta^{13}\text{C}_{\text{TOC}}$  and  $\delta^{13}\text{C}_{n\text{-alkanes}}$  from Xu et al. (2017), for the Da'anzhai Member of Core A on the left; DBT/Phenanthrene ratios vs Pristane/phytane ratios on the right (following Hughes et al., 1995).
